# Supplementary material for: Remarkable enhancement of photovoltaic performance of ZnO/CdTe core–shell nanorod array solar cells through interface passivation with a TiO2 layer
Source: Royal Society of Chemistry journal article supplement (doi:10.1039/c5ra14204k), 2015-01-01
Supplement: c5ra14204k1.pdf [file c5ra14204k1.pdf]

Supplementary Information of

## Remarkable enhancement of photovoltaic performance of ZnO/CdTe core-shell nanorod array solar cells through interface passivation with TiO<sub>2</sub> layer

Guanghui Zhang<sup>a</sup>, Yukun Wu<sup>a</sup>, Huaiyi Ding<sup>b</sup>, Yunsong Zhu<sup>a</sup>, Junwen Li<sup>a</sup>, Yue Lin<sup>b</sup>, Shenlong Jiang<sup>b,c</sup>, Qun Zhang<sup>b,c</sup>, Nan Pan<sup>b,c</sup>, Yi Luo<sup>b,c</sup> and Xiaoping Wang<sup>a,b,c\*</sup>

*a, Department of Physics, University of Science and Technology of China, Hefei 230026, P. R. China*

*b, Hefei National Laboratory for Physical Sciences at the Microscale, University of Science and Technology of China, Hefei 230026, P. R. China*

*c, Synergetic Innovation Center of Quantum Information & Quantum Physics, University of Science and Technology of China, Hefei, Anhui 230026, P. R. China*

\*Correspondence to Xiaoping Wang ([xpwang@ustc.edu.cn](mailto:xpwang@ustc.edu.cn))

**Table S1.** Summarized data of short-circuit current density ( $J_{sc}$ ), open-circuit voltage ( $V_{oc}$ ), fill factor (FF), and overall power conversion efficiency ( $\eta$ ) of ZnO/TiO<sub>2</sub>/CdTe core-shell nanorod array solar cells with 0, 0.5, 1, 2, 4nm TiO<sub>2</sub> interfacial layer.

| TiO <sub>2</sub> thickness (nm) | $J_{sc}$ (mA/cm <sup>2</sup> ) | $V_{oc}$ (mV) | FF (%)   | $\eta$ (%) |
|---------------------------------|--------------------------------|---------------|----------|------------|
| 0                               | 4.74±0.59                      | 165±9         | 30.5±0.7 | 0.24±0.04  |
| 0.5                             | 6.28±1.24                      | 267±14        | 32.6±1.3 | 0.55±0.13  |
| 1                               | 5.57±1.22                      | 379±97        | 33.3±4.4 | 0.68±0.20  |
| 2                               | 5.78±0.62                      | 602±15        | 40.1±6.4 | 1.38±0.17  |
| 4                               | 5.66±0.22                      | 627±13        | 40.5±2.7 | 1.44±0.14  |

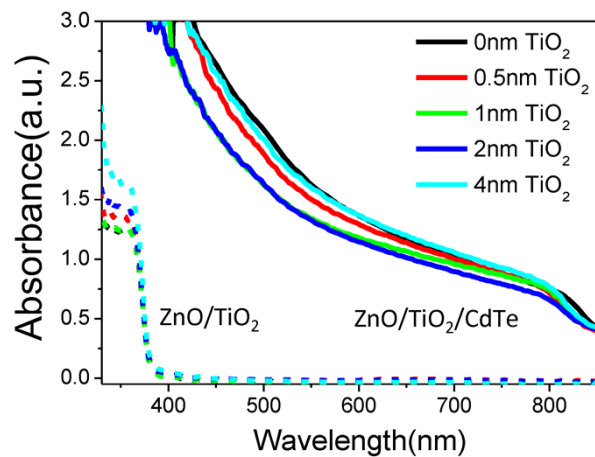

**Fig. S1** UV-Vis absorbance spectra of the bare ZnO, ZnO/TiO<sub>2</sub> (with 0.5, 1, 2, 4nm thickness), annealed ZnO/CdTe and ZnO/TiO<sub>2</sub>(0.5, 1, 2, 4nm)/CdTe NR arrays.

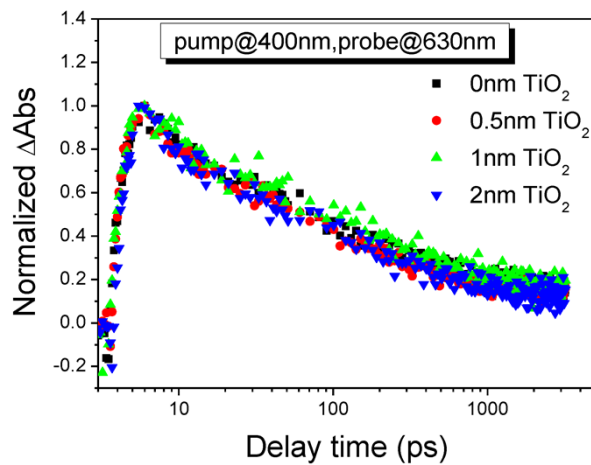

**Fig. S2** Ultrafast transient absorption spectra of the annealed ZnO/TiO<sub>2</sub> (0, 0.5, 1, 2nm)/CdTe NR arrays.

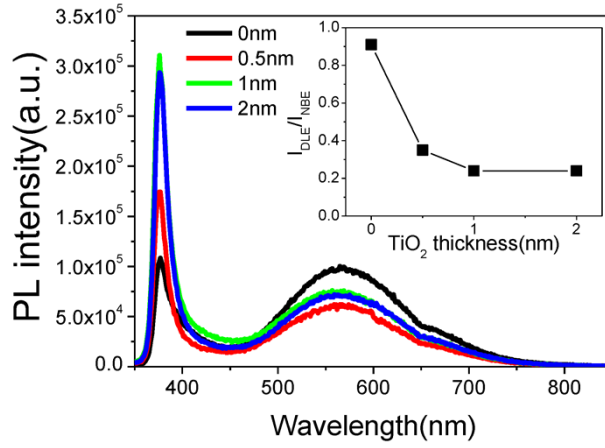

**Fig. S3** Photoluminescence spectra of the bare ZnO and ZnO/TiO<sub>2</sub> (0.5, 1, 2nm) NR arrays.

**Table S2.** Series resistance  $R_s$ , shunt resistance  $R_{sh}$ , capacitance  $C$  and electron lifetime  $t_n$  were obtained from impedance spectra.

| TiO <sub>2</sub> thickness (nm) | $R_s$ (ohm) | $R_{sh}$ (ohm) | $f_c$ (Hz) | $C$ (nF) | $t_n$ (ms) |
|---------------------------------|-------------|----------------|------------|----------|------------|
| 0                               | 110         | 54k            | 371.1      | 7.95     | 0.43       |
| 0.5                             | 60          | 110k           | 69.75      | 20.8     | 2.28       |
| 1                               | 30          | 220k           | 17.44      | 41.5     | 9.13       |
| 2                               | 40          | 390k           | 2.55       | 160.1    | 62.4       |
| 4                               | 1300        | 240k           | 9.8        | 67.7     | 16.2       |

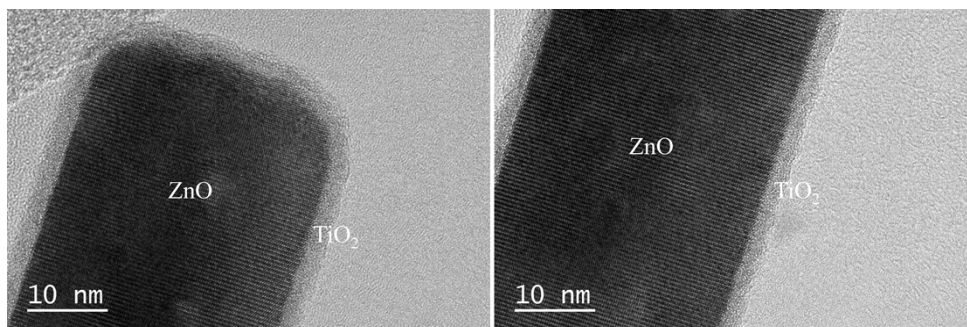

**Fig. S4** High-resolution TEM images of 400°C annealed ZnO/TiO<sub>2</sub> NR.
